# Supplementary material
Source: Springer Nature journal article supplement (https://www.springermedizin.de/resource/supplementary/13032_2013_90_MOESM2_ESM.pdf/9651588)
Supplement: MOESM2 [file 9651588]

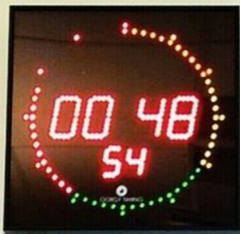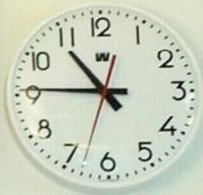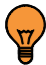

## Primary survey

(incl. lifesaving interventions, blood sampling)

0-10 min

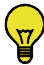

## Imaging

(head/neck/thorax; incl. CT)

10-20 min

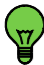

## Secondary survey

(incl. imaging extremities, splints, drains, catheter)

20-35 min

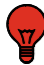

## Transport

(>45 min: trauma room time is too long)

>35 min

Stated times are guidelines
